# Supplementary material for: Beyond Gender: Interoceptive Sensibility as a Key Predictor of Body Image Disturbances
Source: MDPI journal article supplement (doi:10.3390/bs14010025), 2023-12-28
Supplement: s1 [file s1]

## Supplementary Tables and Figures

**Figure S1.** Pearson's Partial Correlation heat-map of Body Image disturbance measures and interoceptive sensibility measures (conditioned on gender): Purple indicates positive associations and brown indicates negative associations. Significance as follows: \*  $p < 0.05$ , \*\*  $p < 0.01$ , \*\*\*  $p < 0.001$

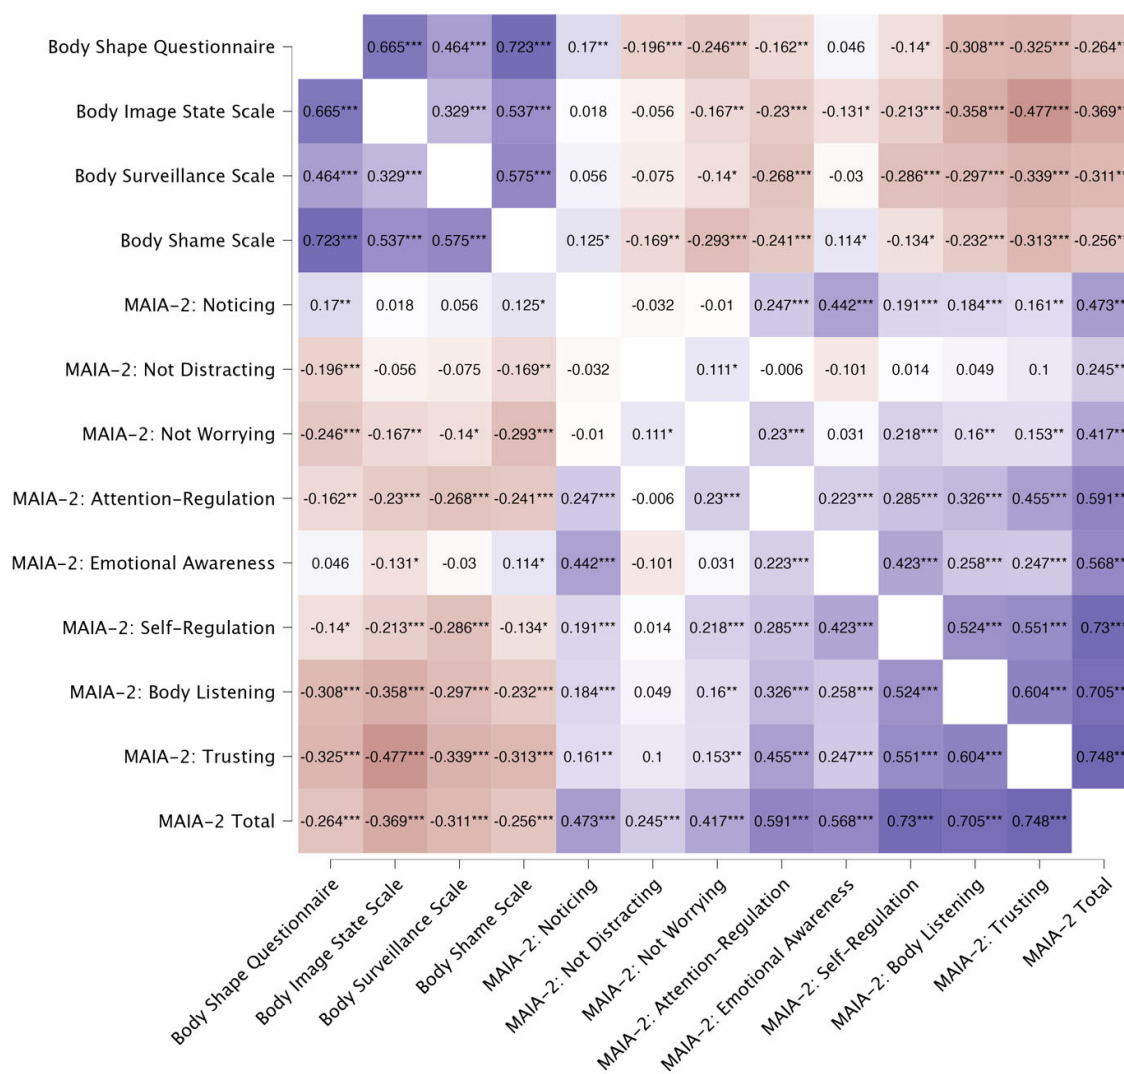

**Table S1. Post Hoc tests for interactions between position and condition on accuracy for ANOVA 4.3.2**

|                            |                             | Mean<br>Difference | SE    | t      | Cohen's<br>d | P <sub>bonf</sub> |
|----------------------------|-----------------------------|--------------------|-------|--------|--------------|-------------------|
| BACKFACING<br>Control      | FRONTFACING<br>Control      | 3.782              | 1.460 | 2.590  | 0.284        | 0.059             |
|                            | BACKFACING<br>Experimental  | 1.722              | 1.456 | 1.182  | 0.129        | 1.000             |
|                            | FRONTFACING<br>Experimental | 7.186              | 1.456 | 4.936  | 0.540        | < .001            |
| FRONTFACING<br>Control     | BACKFACING<br>Experimental  | -2.061             | 1.460 | -1.411 | -0.155       | 0.952             |
|                            | FRONTFACING<br>Experimental | 3.403              | 1.460 | 2.331  | 0.256        | 0.120             |
| BACKFACING<br>Experimental | FRONTFACING<br>Experimental | 5.464              | 1.456 | 3.753  | 0.411        | 0.001             |

*Note.* P-value adjusted for comparing a family of 4

**Table S2. Mixed model ANOVA results for reaction time analysis**

| Cases                                    | Sum of Squares         | df  | Mean Square            | F       | p      | $\eta^2_p$             |
|------------------------------------------|------------------------|-----|------------------------|---------|--------|------------------------|
| Position                                 | 64.412                 | 1   | 64.412                 | 196.200 | < .001 | 0.540                  |
| Position * gender                        | 0.142                  | 1   | 0.142                  | 0.431   | 0.512  | 0.003                  |
| Residuals                                | 54.825                 | 167 | 0.328                  |         |        |                        |
| Orientation                              | 0.153                  | 1   | 0.153                  | 1.136   | 0.288  | 0.007                  |
| Orientation * gender                     | 0.039                  | 1   | 0.039                  | 0.290   | 0.591  | 0.002                  |
| Residuals                                | 22.434                 | 167 | 0.134                  |         |        |                        |
| Weight                                   | 0.052                  | 1   | 0.052                  | 0.390   | 0.533  | 0.002                  |
| Weight * gender                          | 0.268                  | 1   | 0.268                  | 2.012   | 0.158  | 0.012                  |
| Residuals                                | 22.206                 | 167 | 0.133                  |         |        |                        |
| Position * Orientation                   | 4.471                  | 1   | 4.471                  | 27.036  | < .001 | 0.139                  |
| Position * Orientation * gender          | 0.400                  | 1   | 0.400                  | 2.419   | 0.122  | 0.014                  |
| Residuals                                | 27.619                 | 167 | 0.165                  |         |        |                        |
| Position * Weight                        | $6.786 \times 10^{-4}$ | 1   | $6.786 \times 10^{-4}$ | 0.005   | 0.944  | $2.961 \times 10^{-5}$ |
| Position * Weight * gender               | $3.064 \times 10^{-4}$ | 1   | $3.064 \times 10^{-4}$ | 0.002   | 0.962  | $1.337 \times 10^{-5}$ |
| Residuals                                | 22.919                 | 167 | 0.137                  |         |        |                        |
| Orientation * Weight                     | 0.058                  | 1   | 0.058                  | 0.435   | 0.511  | 0.003                  |
| Orientation * Weight * gender            | 0.350                  | 1   | 0.350                  | 2.623   | 0.107  | 0.015                  |
| Residuals                                | 22.299                 | 167 | 0.134                  |         |        |                        |
| Position * Orientation * Weight          | $1.803 \times 10^{-4}$ | 1   | $1.803 \times 10^{-4}$ | 0.001   | 0.970  | $8.395 \times 10^{-6}$ |
| Position * Orientation * Weight * gender | 0.566                  | 1   | 0.566                  | 4.403   | 0.037  | 0.026                  |
| Residuals                                | 21.477                 | 167 | 0.129                  |         |        |                        |

*Note.* Type III Sum of Squares

**Table S3. Post Hoc Comparisons for Position \* Orientation interaction for ANOVA 4.3.3**

|                 |                  | <b>Mean<br/>Difference</b> | <b>SE</b> | <b>t</b> | <b>Cohen's<br/>d</b> | <b>p<sub>bonf</sub></b> |
|-----------------|------------------|----------------------------|-----------|----------|----------------------|-------------------------|
| Back-facing, 0  | Front-facing, 0  | -0.552                     | 0.038     | -14.432  | -0.843               | < .001 ***              |
|                 | Back-facing, 90  | -0.136                     | 0.030     | -4.576   | -0.208               | < .001 ***              |
|                 | Front-facing, 90 | -0.458                     | 0.037     | -12.374  | -0.699               | < .001 ***              |
| Front-facing, 0 | Back-facing, 90  | 0.416                      | 0.037     | 11.225   | 0.634                | < .001 ***              |
|                 | Front-facing, 90 | 0.094                      | 0.030     | 3.149    | 0.143                | 0.011 *                 |
| Back-facing, 90 | Front-facing, 90 | -0.322                     | 0.038     | -8.413   | -0.491               | < .001 ***              |

\* p < .05, \*\* p < .01, \*\*\* p < .001

**Table S4. Regression results for the effect of BID and IS on the egocentric transformation cost**

**Coefficients**

| <b>Model</b>   |                       | <b>Unstandardized</b> | <b>Standard Error</b> | <b>Standardized<sup>a</sup></b> | <b>t</b> | <b>p</b> |
|----------------|-----------------------|-----------------------|-----------------------|---------------------------------|----------|----------|
| H <sub>0</sub> | (Intercept)           | 0.548                 | 0.044                 |                                 | 12.433   | < .001   |
|                | Orientation (90)      | -0.227                | 0.052                 |                                 | -4.355   | < .001   |
|                | Gender (Male)         | 0.007                 | 0.052                 |                                 | 0.132    | 0.895    |
| H <sub>1</sub> | (Intercept)           | 0.828                 | 0.203                 |                                 | 4.080    | < .001   |
|                | MAIA-2 Total          | -0.012                | 0.008                 | -0.083                          | -1.432   | 0.153    |
|                | Body Image            | -0.002                | 0.011                 | -0.009                          | -0.143   | 0.886    |
|                | Disturbance Composite | -0.002                | 0.011                 | -0.009                          | -0.143   | 0.886    |
|                | Orientation (90)      | -0.227                | 0.052                 |                                 | -4.356   | < .001   |
|                | Gender (Male)         | 0.009                 | 0.056                 |                                 | 0.164    | 0.869    |

<sup>a</sup> Standardized coefficients can only be computed for continuous predictors.
